# Supplementary material for: Mast cells and dendritic cells form synapses that facilitate antigen transfer for T cell activation
Source: PubMed Central journal article supplement — J Cell Biol. 2015 Aug 31;210(5):851–64. doi: 10.1083/jcb.201412074 (PMC4555818; doi:10.1083/jcb.201412074), 2015-08-31
Supplement: supp_jcb.201412074_JCB_201412074_sm.pdf [file supp_jcb.201412074_JCB_201412074_sm.pdf]

Tonsil Positive

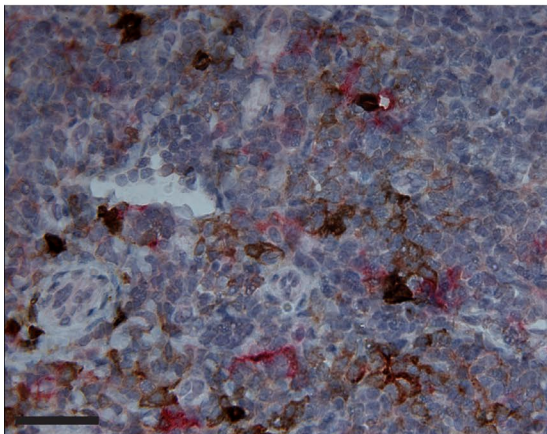

Tonsil Negative

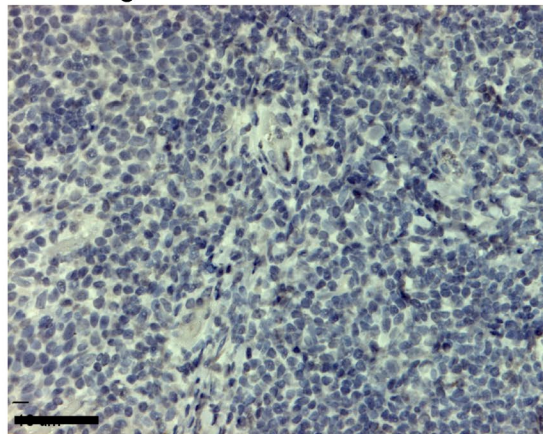

Skin Negative

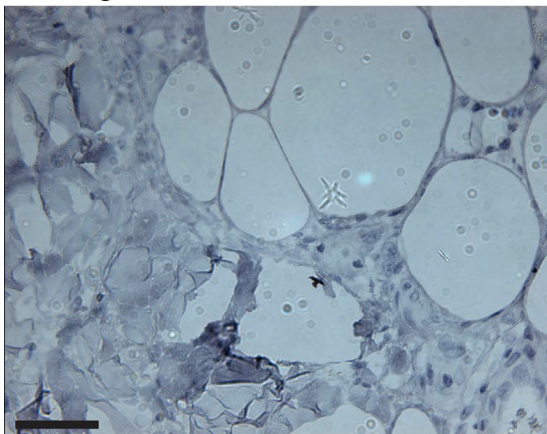

Colon Negative

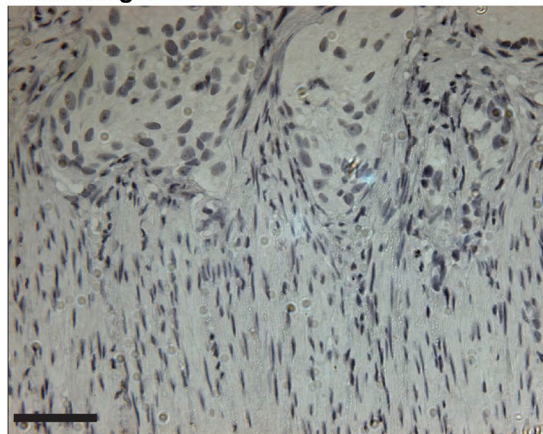

Lung Negative

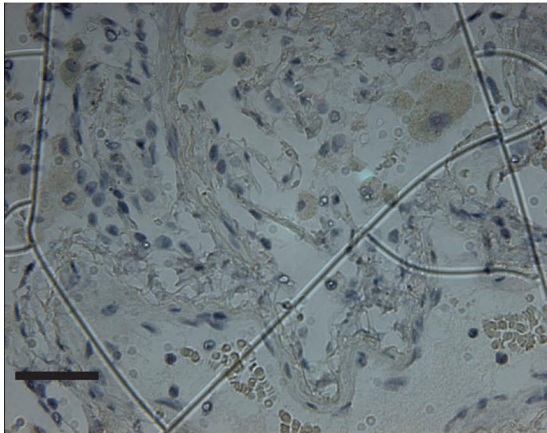

Figure S1. IHC of tonsil controls (positive and negative) and skin, colon, and lung negative controls. Controls were performed with each set of immunohistochemical experiments represented in Fig. 1 A. Images are brightness and contrast enhanced. Bars, 50  $\mu$ m.

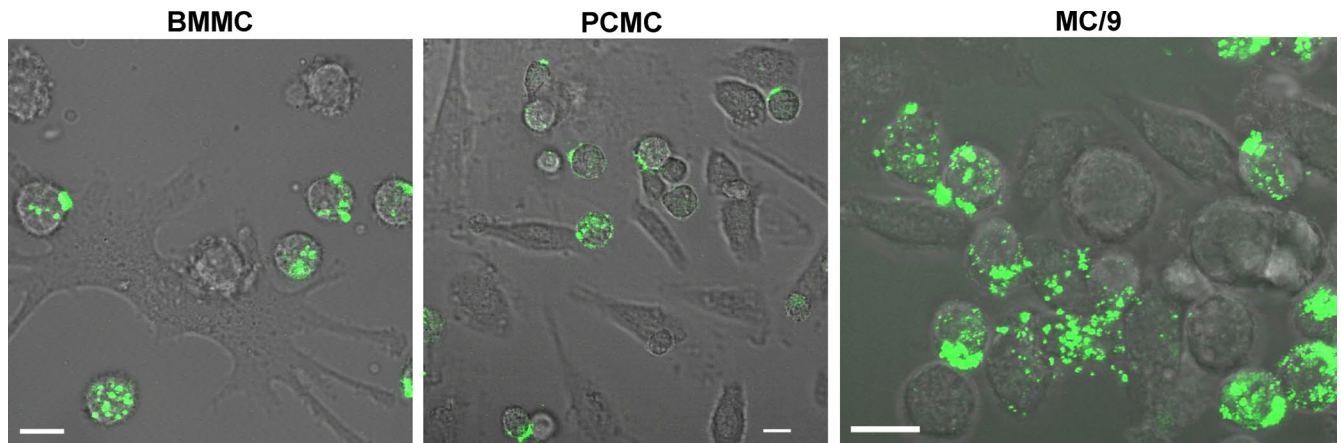

Figure S2. **Single images from live-cell imaging of different types of actMC-DC interactions.** BMMC, PCMC, and MC/9 cells all demonstrate polarized accumulation of internalized AF488-IgE (green) after stimulation with DNP-BSA and in the presence of imDCs. Images are brightness and contrast enhanced. Bars, 10  $\mu$ m.

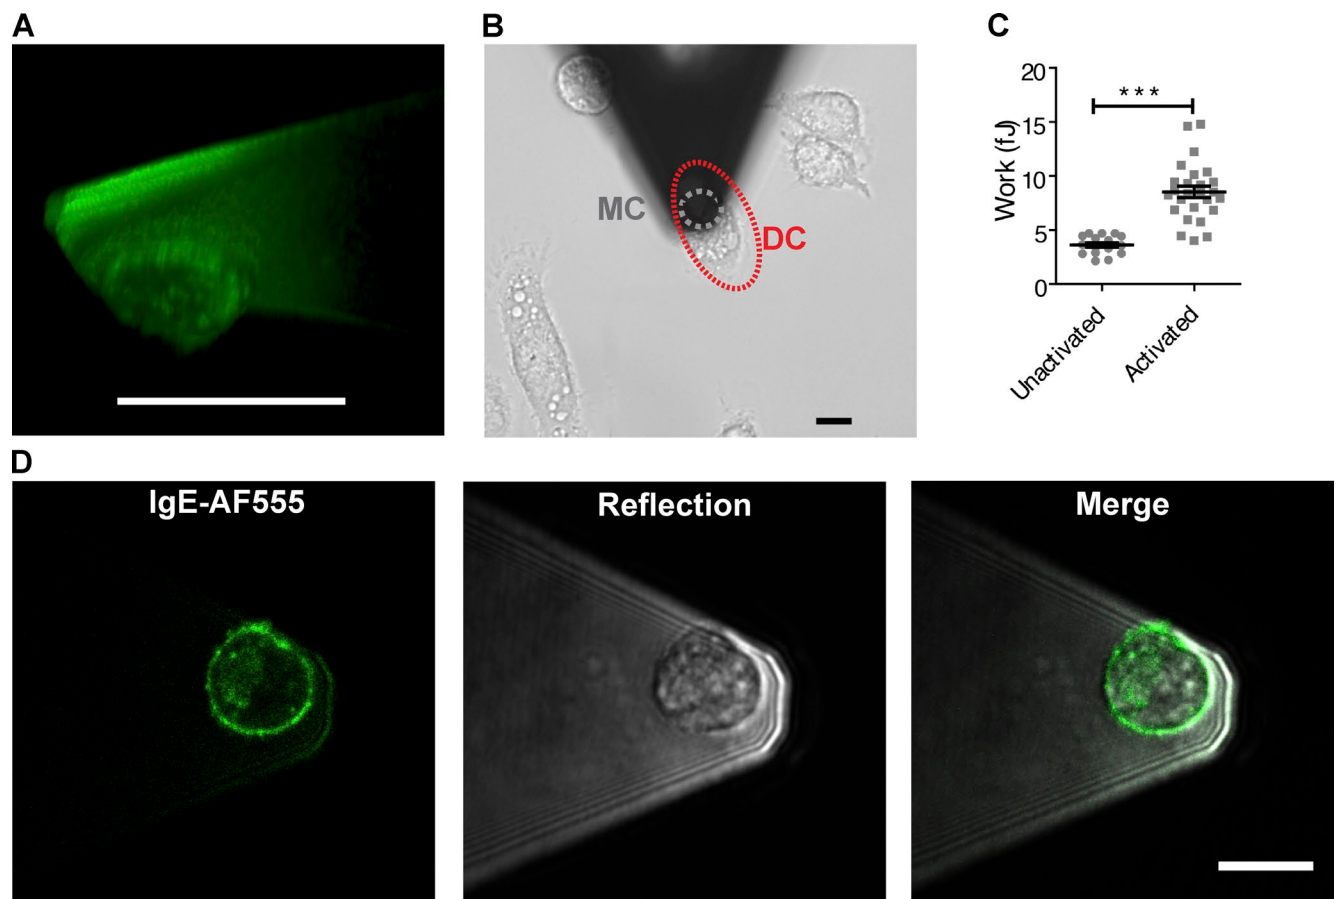

Figure S3. **AFM MC-imDC interactions.** (A) 3D reconstruction of a z stack by confocal scanning light microscopy of an MC labeled with AF555 IgE on the cantilever (image is pseudocolored). Close to the cantilever, reflected light gives a ghost image of the apex. (B) Bright-field image of an MC on the cantilever interacting with a DC during an adhesion measurement. Outlines of cells are indicated with dotted lines. (C) The work in femtojoule needed to detach unactivated or activated MCs from DCs (unactivated:  $n = 5$  experiments;  $n = 21$  MC-imDC contacts;  $n = 12$  F-D curves, activated;  $n = 4$  experiments;  $n = 24$  MC-imDC contacts;  $n = 140$  F-D curves). \*\*\*,  $P < 0.001$  (by Mann-Whitney test). Error bars are SEM. (D) Single section of the z stack in the center of an MC labeled with AF555 IgE and reflection of the laser to image the cantilever are shown. Image is pseudocolored. Bars, 10  $\mu$ m.

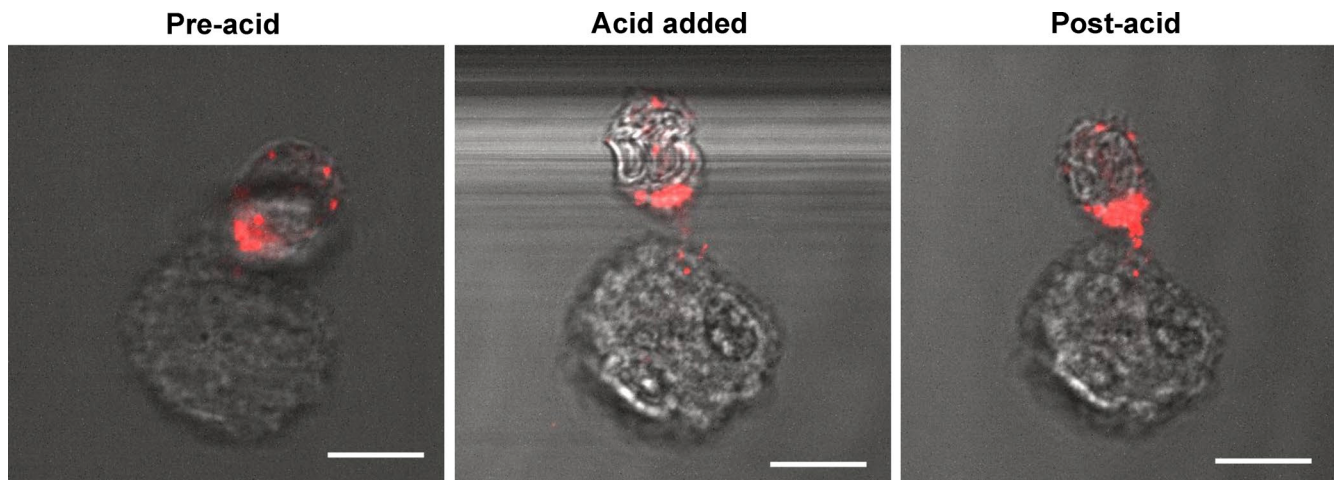

Figure S4. **Images from live-cell imaging of acid strip on an actMC-DC conjugate.** IgE-FcεRI (red) is polarized at the cell junction and remains present after exposure to low pH buffer (third image), confirming that the antigen cross-linked IgE-FcεRI complexes are internalized. Images are brightness and contrast enhanced. Bars, 10  $\mu$ m.

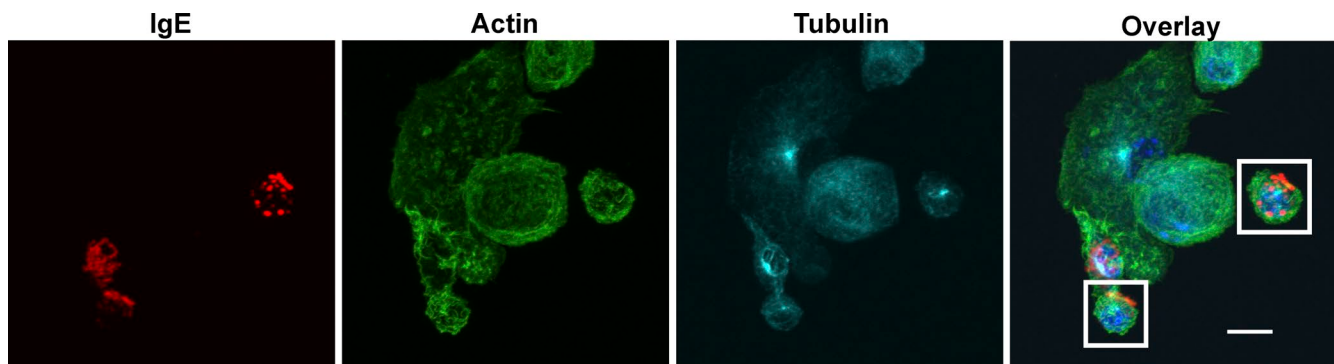

Figure S5. **Examples of MC polarization.** MC polarization is maintained even when DC contact is lost (boxed MCs in overlay). Images are from a maximum projection of a fixed actMC-DC sample. The MTOC (tubulin, cyan) is located internal to the polarized IgE (red) vesicles and region where F-actin (green) is reduced at the membrane. Nuclei (Hoechst, blue) labeling is included in the overlay. Images are brightness and contrast enhanced. Bar, 10  $\mu$ m.

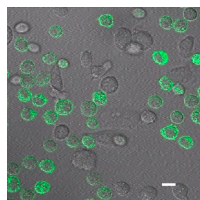

Video 1. **Interactions between unactivated MCs and imDCs.** Unactivated MCs do not demonstrate polarization in the presence of imDCs (Fig. 3 A, Unactivated). Live-cell, time-lapse confocal imaging (LSM510-META; Carl Zeiss) at 37°C of BMMCs primed with AF488 IgE (green) in co-culture with imDCs. Image acquisition was at one frame every 4 s for a total time of 1 min and 48 s; playback is four frames per second. Bar, 10  $\mu$ m.

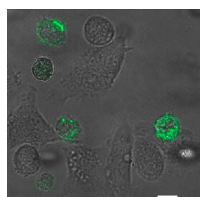

Video 2. **Interactions between actMCs and imDCs.** Example of long-lived interactions between actMCs and imDC early after activation (imaging initiated within 5 min). BMMCs were primed with AF488-IgE (green) and then activated through cross-linking of FcεRI with DNP-BSA. Image acquisition was one frame every 10 s for a total time of 8 min and 20 s. Playback is five frames per second. Bar, 10  $\mu$ m. Images acquired with live-cell, time-lapse confocal imaging (LSM510-META; Carl Zeiss) at 37°C.

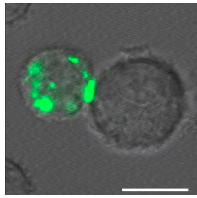

Video 3. **Polarization of actMCs.** Activated MCs form long-lived interactions and polarize when incubated with imDCs (Fig. 3 A, Activated). Example of long-lived interaction (synapse) between an actBMMC and DC. The BMMC was primed with AF488-IgE (green) and then activated by cross-linking of FcεRI with DNP-BSA. Image acquisition was one frame every 4 s for a total time of 3 min and 16 s. Playback is five frames per second. Bar, 10 μm. Images acquired with live-cell, time-lapse confocal imaging (LSM510-META; Carl Zeiss) at 37°C.

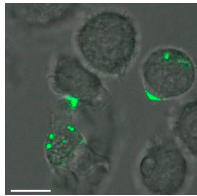

Video 4. **Activated MC/9s with imDCs.** Activated MC/9s become polarized and form uropod-like structures when in the presence of imDCs. Live-cell imaging with time-lapse confocal imaging (LSM510-META; Carl Zeiss) at 37°C of AF488-IgE (green) primed MC/9 cells contacting an imDC after MC/9 activation via cross-linking with DNP-BSA. The uropod structure that forms at the cellular junction is unique to the MC/9 cell line. Images acquired at one frame every 10 s for a total time of 16 min and 30 s; playback is 15 frames per second. Bar, 10 μm.

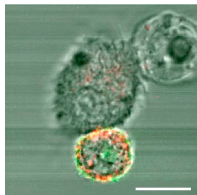

Video 5. **GPI-GFP during BMMC material transfer.** GPI-GFP is not transferred from actMCs to imDCs (Fig. 3 B, top). Live imaging of an actMC (BMMC) expressing GPI-GFP (green) in contact with an imDC. Transfer of internalized AF555-FcεRI-IgE (red) occurs in a rapid manner at the site of actMC-DC contact. The transferred material does not contain GPI-GFP. Image acquisition at one frame every 9 s for a total time of 13 min and 33 s. Playback, five frames per second. Images acquired with live-cell, time-lapse confocal imaging (LSM510-META; Carl Zeiss) at 37°C. Bar, 10 μm.

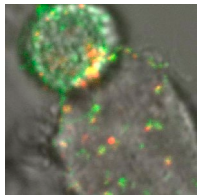

Video 6. **CD9-GFP during BMMC material transfer.** An exosome marker (CD9) is transferred with IgE from actMCs to imDCs (Fig. 3 B, bottom). Live-cell, time-lapse confocal imaging (LSM510-META; Carl Zeiss) of an actMC (BMMC) expressing CD9-GFP (green) in contact with an imDC. Transfer of AF555-IgE (red) from the actMC to the imDC is seen to colocalize with CD9-GFP (yellow). Images acquired at one frame every 16 s with a total acquisition time of 2 min and 23 s. Playback, two frames per second. Images acquired at 37°C. Bar, 5 μm.
